# Supplementary material for: Involvement and targeted intervention of benzo(a)pyrene-regulated apoptosis related proteome modification and muti-drug resistance in hepatocellular carcinoma
Source: PubMed Central journal article supplement (PMC10090052; doi:10.1038/s41419-023-05771-7), 2023-04-12

**GRP75, 75 kDa**

Fig. 2C

Fig. 3A

Fig. 3A

Fig. 3C

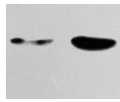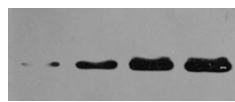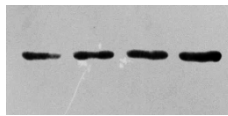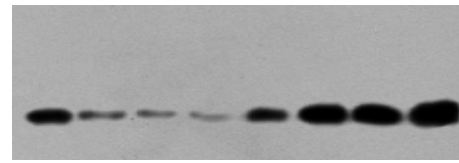

Fig. 5C

Fig. 6A

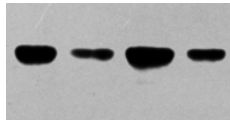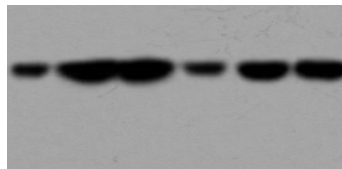

**Actin, 45 kDa**

Fig. 2C

Fig. 3A

Fig. 3A

Fig. 3C

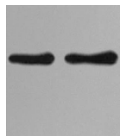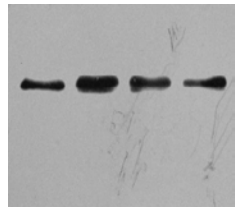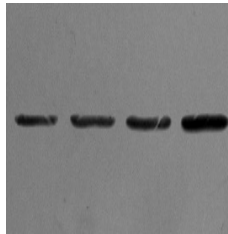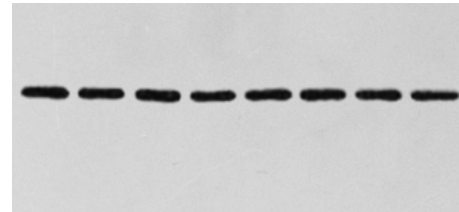

Fig. 5C

Fig. 6A

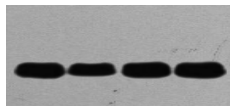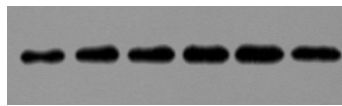

**XIAP-pS87, 53 kDa**

Fig. 5C

Fig. 6A

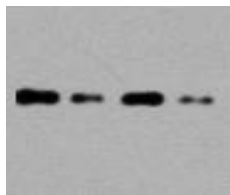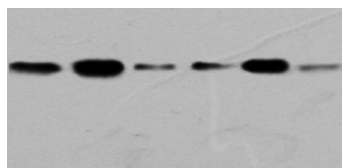

**XIAP, 53 kDa**

Fig. 5C

Fig. 6A

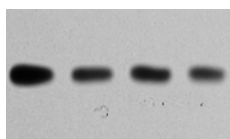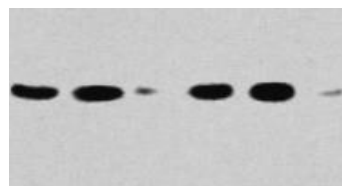

Supplement: 41419_2023_5771_MOESM3_ESM.pdf [file 41419_2023_5771_MOESM3_ESM.pdf]
